# Supplementary material for: Enhancing the remarkable adsorption of Pb2+ in a series of sulfonic-functionalized Zr-based MOFs: a combined theoretical and experimental study for elucidating the adsorption mechanism
Source: Royal Society of Chemistry journal article supplement (doi:10.1039/d2dt01009g), 2022-01-01
Supplement: d2dt01009g1.pdf [file d2dt01009g1.pdf]

## Supporting information

### **Enhancing remarkable adsorption of Pb<sup>2+</sup> in a series of sulfonic-functionalized Zr-based MOF: a combined theoretical and experimental study for elucidating adsorption mechanism**

Cuong C. Tran,<sup>a</sup> Hieu C. Dong,<sup>b,c</sup> Vy T. N. Truong,<sup>d</sup> Thinh T. M. Bui,<sup>a</sup> Hung N. Nguyen,<sup>a</sup> Tuyet A. T. Nguyen,<sup>a</sup> Nam N. Dang<sup>c</sup> and My V. Nguyen<sup>\*,a</sup>

<sup>a</sup>Faculty of Chemistry, Ho Chi Minh City University of Education, Ho Chi Minh City, 700000, Vietnam.

<sup>b</sup>Future Materials and Devices Laboratory, Institute of Fundamental and Applied Sciences, Duy Tan University, Ho Chi Minh City, 700000, Vietnam.

<sup>c</sup>Faculty of Natural Sciences, Duy Tan University, Da Nang, 550000, Vietnam.

<sup>d</sup>Royal Melbourne Institute of Technology (RMIT) University, Ho Chi Minh City 700000, Vietnam.

\*To whom correspondence should be addressed: [mynv@hcmue.edu.vn](mailto:mynv@hcmue.edu.vn)

**Keywords:** SO<sub>3</sub>-functionalized Zr-MOFs, uptake of Pb<sup>2+</sup>, Adsorption mechanism of heavy metal ion.

---

## Table of Contents

---

|                    |                                                                                                                                             |                |
|--------------------|---------------------------------------------------------------------------------------------------------------------------------------------|----------------|
| <b>Section S1</b>  | <i>Synthesis of materials</i>                                                                                                               | <b>S3</b>      |
| <b>Section S2</b>  | <i><sup>1</sup>H-NMR analysis of H<sub>3</sub>SNDC, H<sub>4</sub>SNDC, digested H<sup>+</sup>⊂VNU-17, and digested H<sup>+</sup>⊂VNU-23</i> | <b>S4-S7</b>   |
| <b>Section S3</b>  | <i>Fourier transform infrared (FT-IR) analysis</i>                                                                                          | <b>S8-S9</b>   |
| <b>Section S4</b>  | <i>Powder X-ray diffraction patterns (PXRD)</i>                                                                                             | <b>S10-S12</b> |
| <b>Section S5</b>  | <i>Thermogravimetric analysis (TGA) and Differential scanning calorimetry (DSC) curves</i>                                                  | <b>S13-S15</b> |
| <b>Section S6</b>  | <i>N<sub>2</sub> adsorption measurement</i>                                                                                                 | <b>S16</b>     |
| <b>Section S7</b>  | <i>Scanning electron microscopy (SEM) and energy-dispersive X-ray mapping (EDX-mapping) analysis</i>                                        | <b>S17-S20</b> |
| <b>Section S8</b>  | <i>Transmission electron microscopy (TEM) analysis</i>                                                                                      | <b>S21</b>     |
| <b>Section S9</b>  | <i>Adsorption studies</i>                                                                                                                   | <b>S22-S30</b> |
| <b>Section S10</b> | <i>The stability of H<sup>+</sup>⊂VNU-23 during the adsorption and desorption process of Pb<sup>2+</sup></i>                                | <b>S31-S32</b> |

---

## Section S1. Synthesis of materials

### Synthesis of Zr-bcu-NDC

A mixture of  $\text{ZrOCl}_2 \cdot 8\text{H}_2\text{O}$  (400 mg, 1.246 mmol) and  $\text{H}_2\text{NDC}$  (130 mg, 0.602 mmol) was introduced into a 20 mL Pyrex vial containing DMF (5 mL) and trifluoroacetic acid (1.1 mL). The mixture was then ultrasonicated in 5 min and heated at 120 °C for 3 days. Continuously, the solid was centrifugated, washed with DMF for 2 days (20 mL per day), and exchanged with MeOH for 2 days (20 mL per day). Finally, the sample was collected, dried, and activated under vacuum at 80 °C for 12 h to obtain a white powder.

### Synthesis of acidified VNU-17 ( $\text{H}^+\text{VNU-17}$ )

A mixture of  $\text{ZrOCl}_2 \cdot 8\text{H}_2\text{O}$  (260 mg, 0.810 mmol) and  $\text{H}_3\text{SNDC}$  (270 mg, 0.915 mmol) was added to a 100 mL glass bottle including 40 mL of DMF and 6.5 mL formic acid. Then, the mixture was ultrasonicated in 10 min and heated for 2 days at 120 °C. The mixture was cooled to room temperature and centrifugated to acquire a white powder, termed pristine VNU-17 ( $\text{DMA}\text{VNU-17}$ ). This solid was washed with DMF for 3 days (15 mL per day) to remove the unreacted substances and immersed in a  $\text{H}_2\text{SO}_4$  solution of 0.3 M for 2 days (5 times per day). Subsequently, the sample was washed with an excess amount of methanol and water solution to pH = 5. The material was exchanged with MeOH for 2 days (20 mL per day), dried, and activated under vacuum at 80 °C for 12 h to acquire a pure solid, namely  $\text{H}^+\text{VNU-17}$ .

### Synthesis of acidified VNU-23 ( $\text{H}^+\text{VNU-23}$ )

$\text{ZrOCl}_2 \cdot 8\text{H}_2\text{O}$  (196 mg, 0.611 mmol) and  $\text{H}_4\text{SNDC}$  (248 mg, 0.660 mmol) was dissolved by a mixture containing 30 mL of DMF and 7.5 mL formic acid in a 100 mL glass bottle. The mixture was then heated at 120 °C for 2 days. After cooling down to room temperature, the white solid was centrifugated, namely pristine VNU-23 ( $\text{DMA}\text{VNU-23}$ ). This solid was washed with DMF for 3 days (15 mL per day) to remove the unreacted starting materials and immersed in a 0.3 M of  $\text{H}_2\text{SO}_4$  solution for 2 days (5 times per day). Next, the product was washed with an excess amount of methanol and water solution to pH = 5. Finally, the product was exchanged with MeOH for 2 days (20 mL per day), dried, and activated under vacuum at 80 °C for 12 h to acquire a pure solid, termed  $\text{H}^+\text{VNU-23}$ .

**Section S2.**  $^1\text{H-NMR}$  analysis of  $\text{H}_3\text{SNDC}$ ,  $\text{H}_4\text{SNDC}$ , digested  $\text{H}^+\text{C}\text{VNU-17}$ , and digested  $\text{H}^+\text{C}\text{VNU-23}$

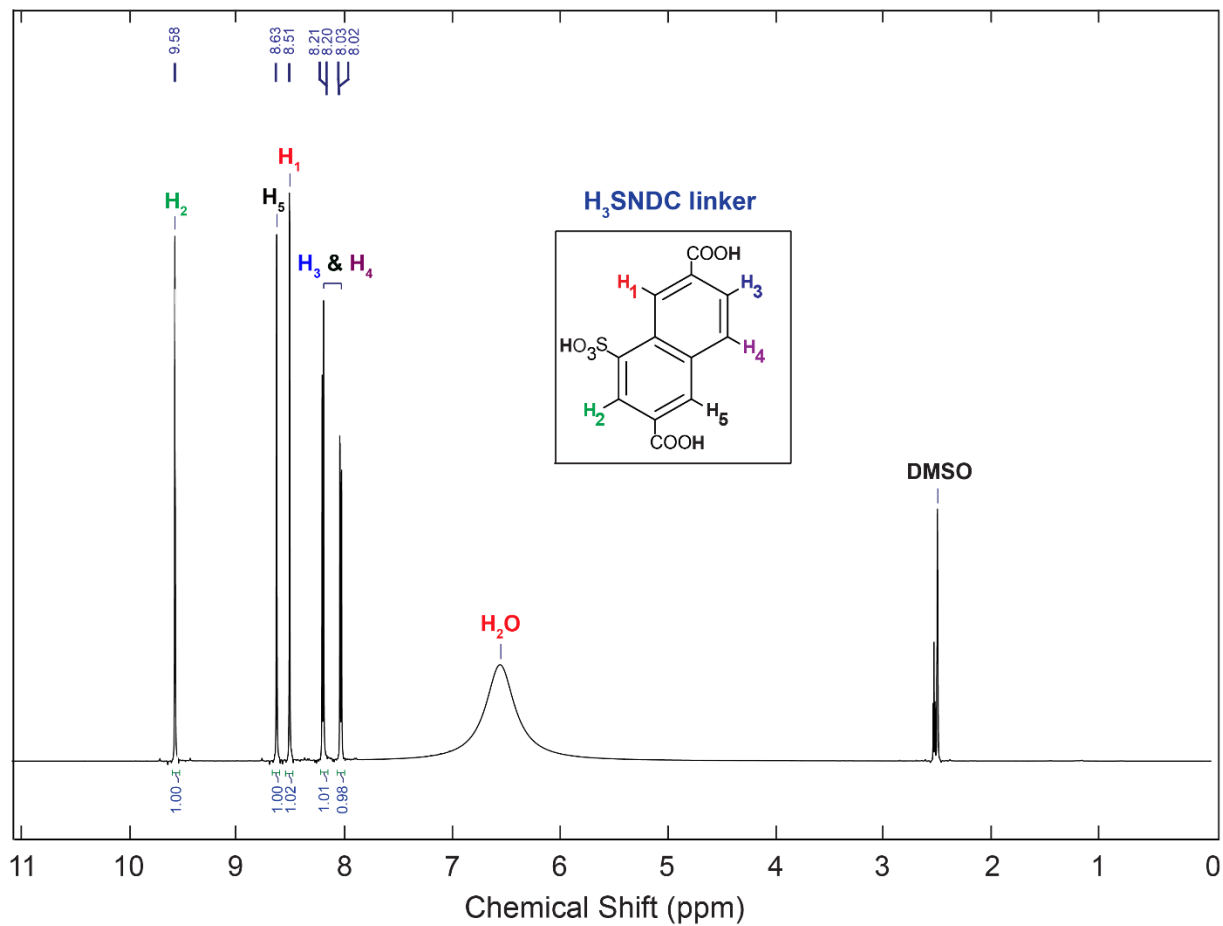

**Figure S1.**  $^1\text{H-NMR}$  analysis of the  $\text{H}_3\text{SNDC}$  linker.

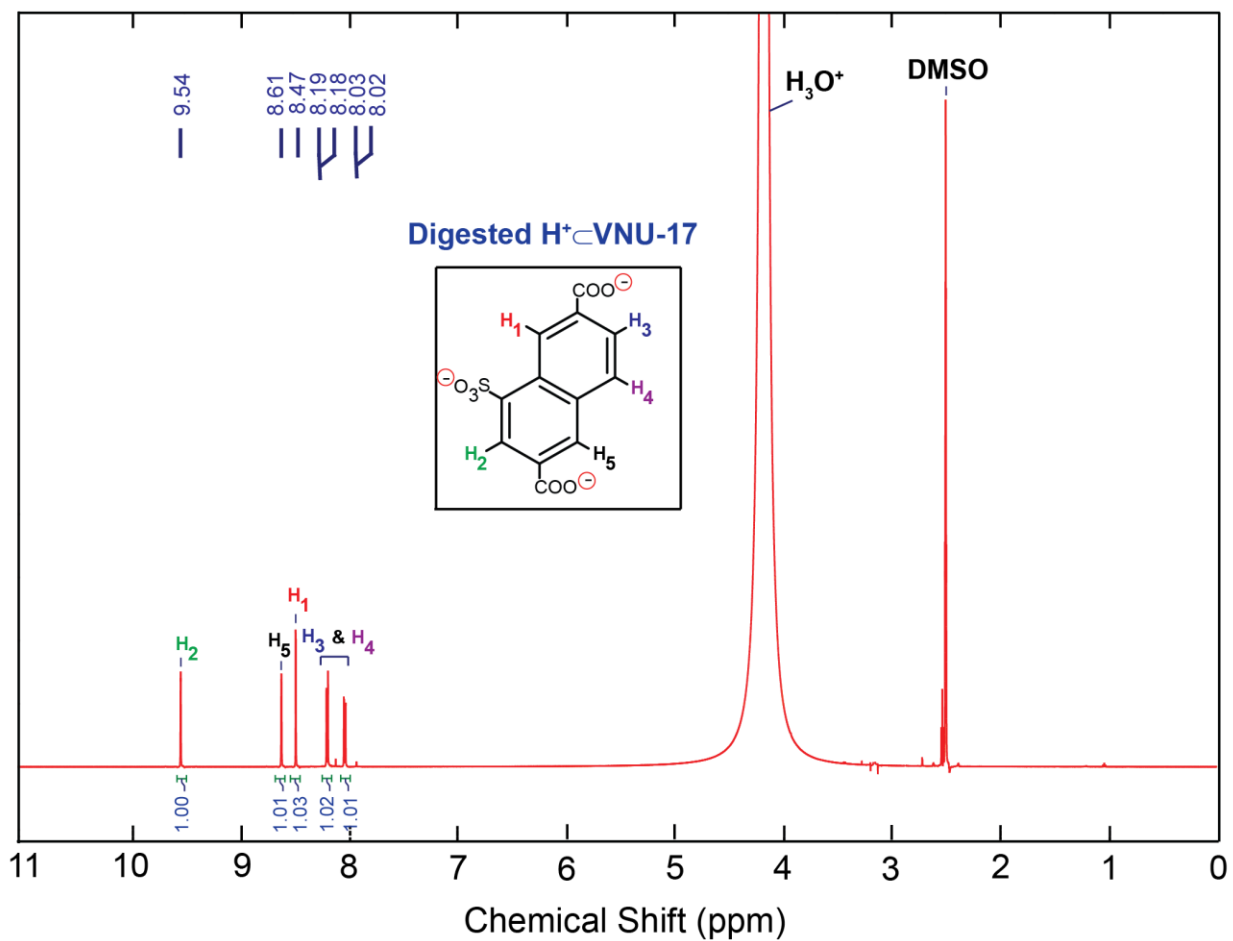

**Figure S2.** <sup>1</sup>H-NMR analysis of digested H<sup>+</sup>CVNU-17.

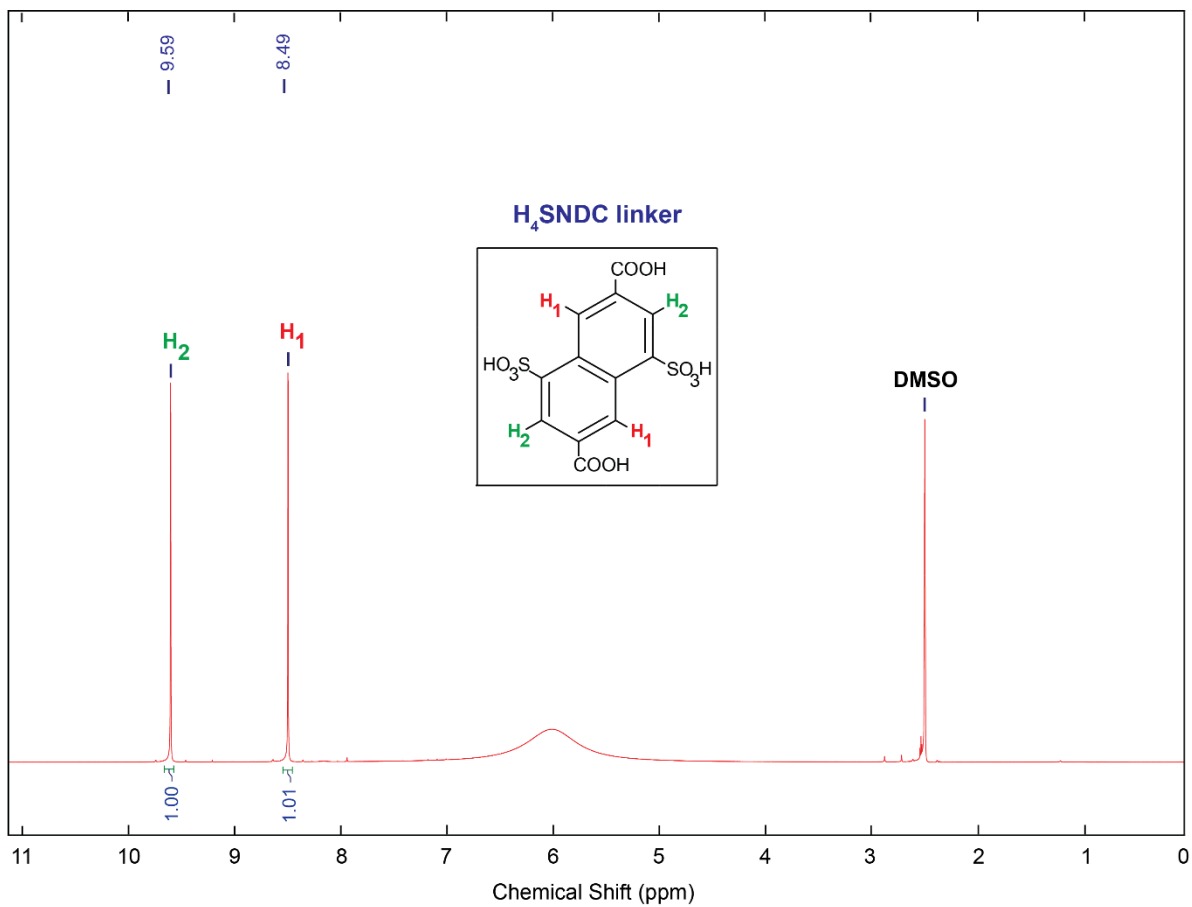

**Figure S3.** <sup>1</sup>H-NMR analysis of the H<sub>4</sub>SNDC linker.

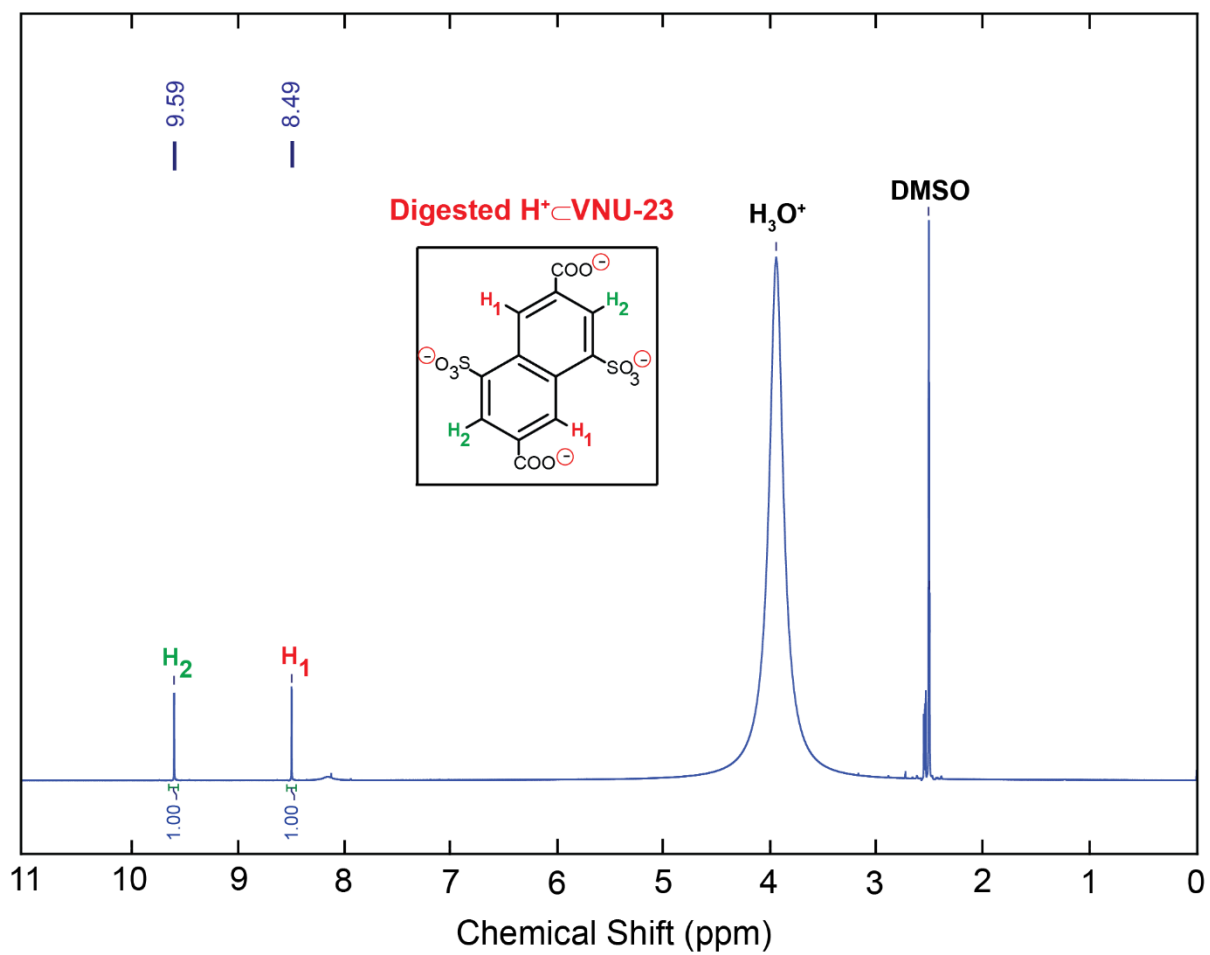

**Figure S4.** <sup>1</sup>H-NMR analysis of digested H<sup>+</sup>VNU-23.

### Section S3. Fourier transform infrared (FT-IR) analysis

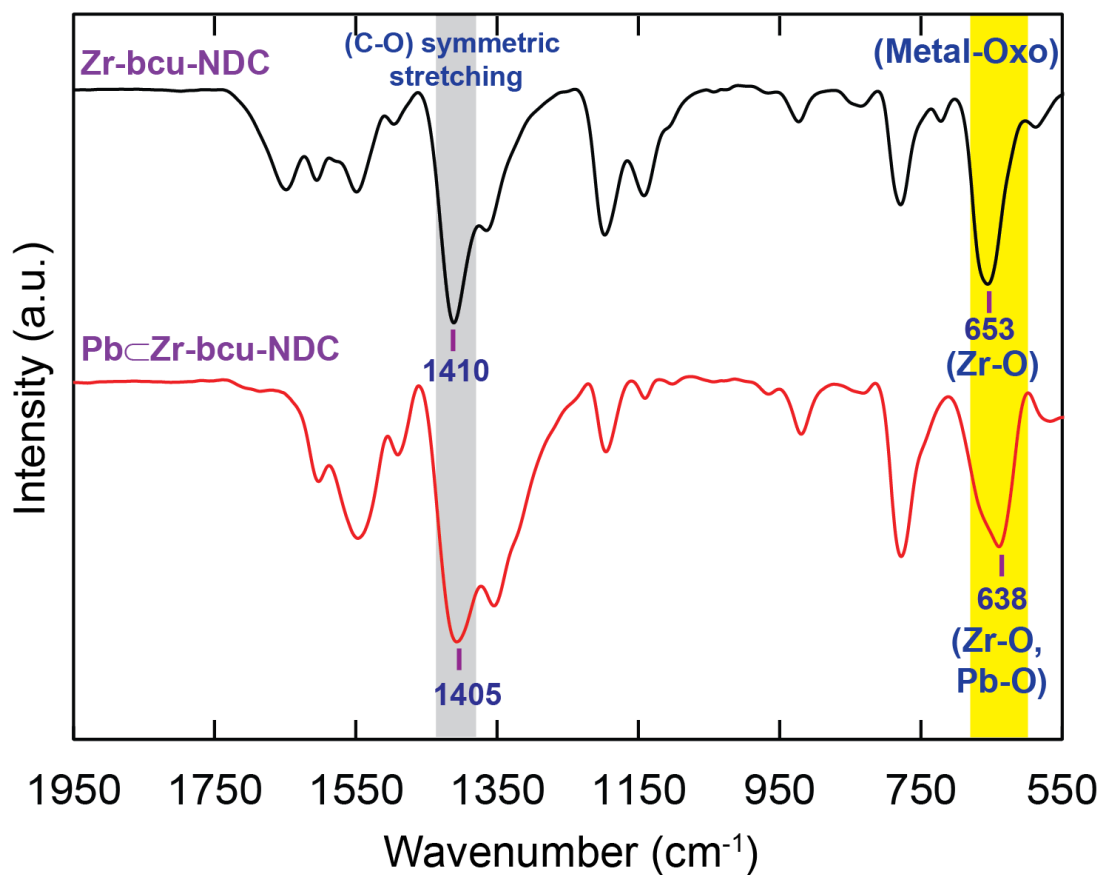

**Figure S5.** FT-IR spectrum of Zr-bcu-NDC (black) in comparison with Pb-Zr-bcu-NDC (red).



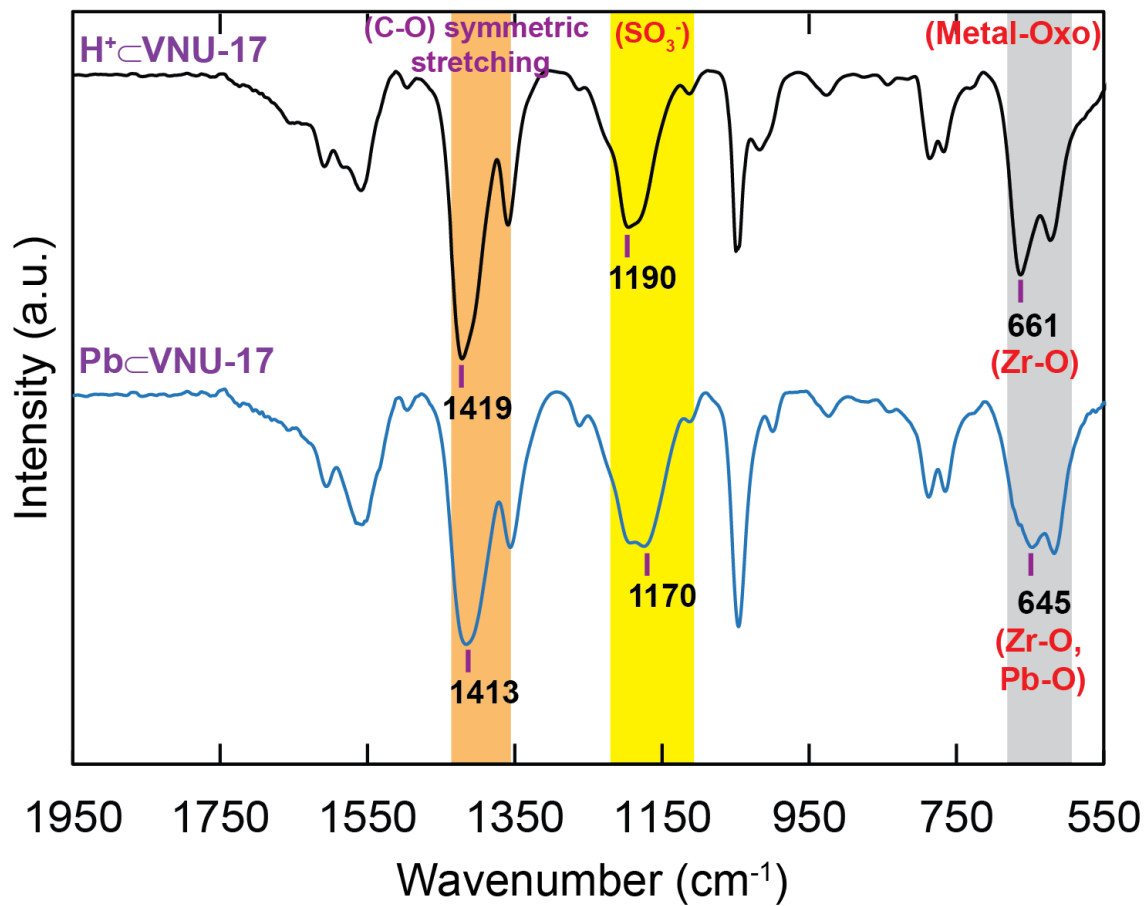

**Figure S6.** FT-IR spectrum of H<sup>+</sup> cation-exchanged VNU-17 (black) in comparison with Pb cation-exchanged VNU-17 (blue).

## Section S4. Powder X-ray diffraction patterns (PXRD)

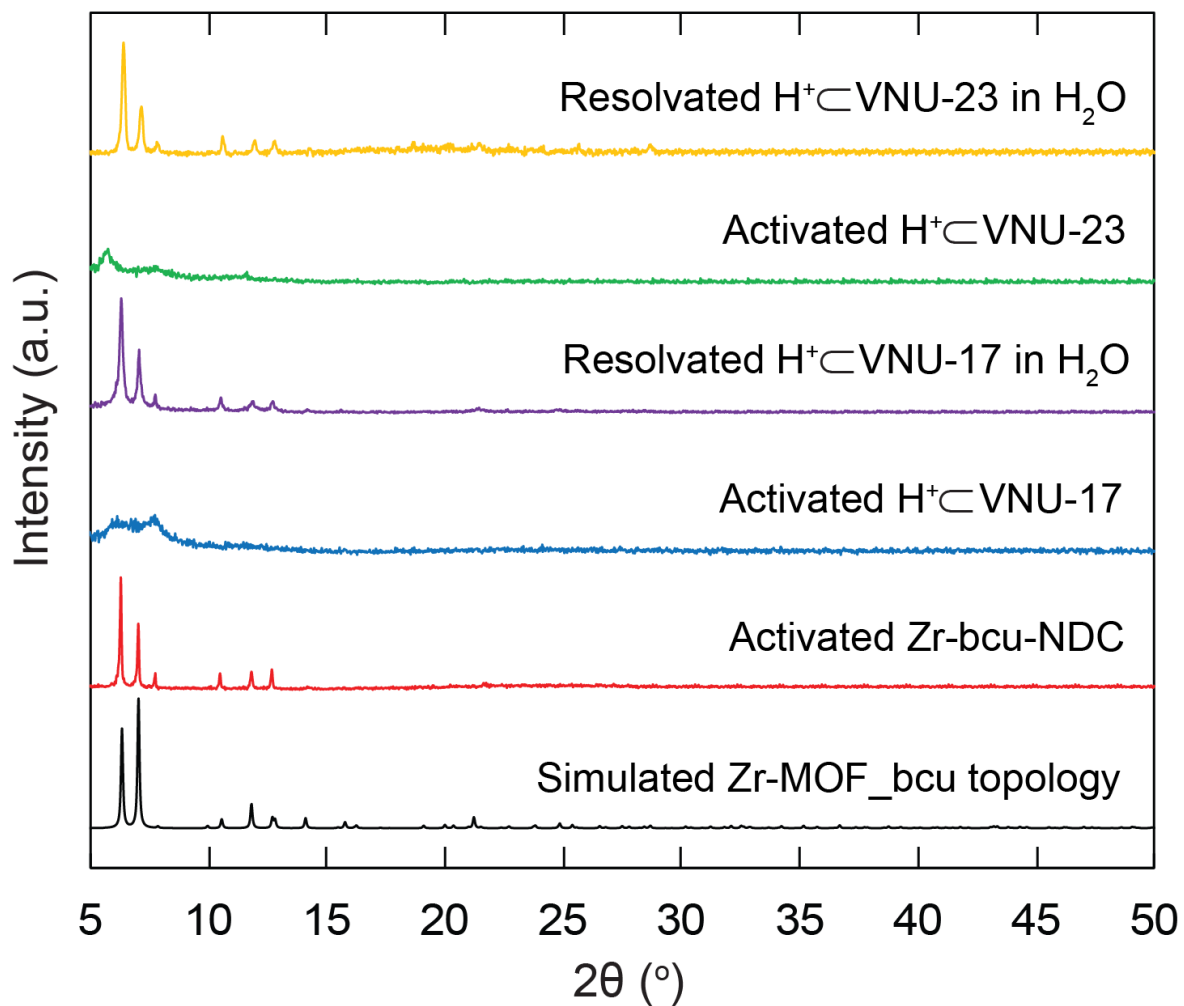

**Figure S7.** PXRD patterns of simulated structure with bcu topology (black) in comparison with activated Zr-bcu-NDC (red), activated H<sup>+</sup>⊂VNU-17 (blue), re-solvated H<sup>+</sup>⊂VNU-17 in water (purple), activated H<sup>+</sup>⊂VNU-23 (green), and re-solvated H<sup>+</sup>⊂VNU-23 in water (orange).

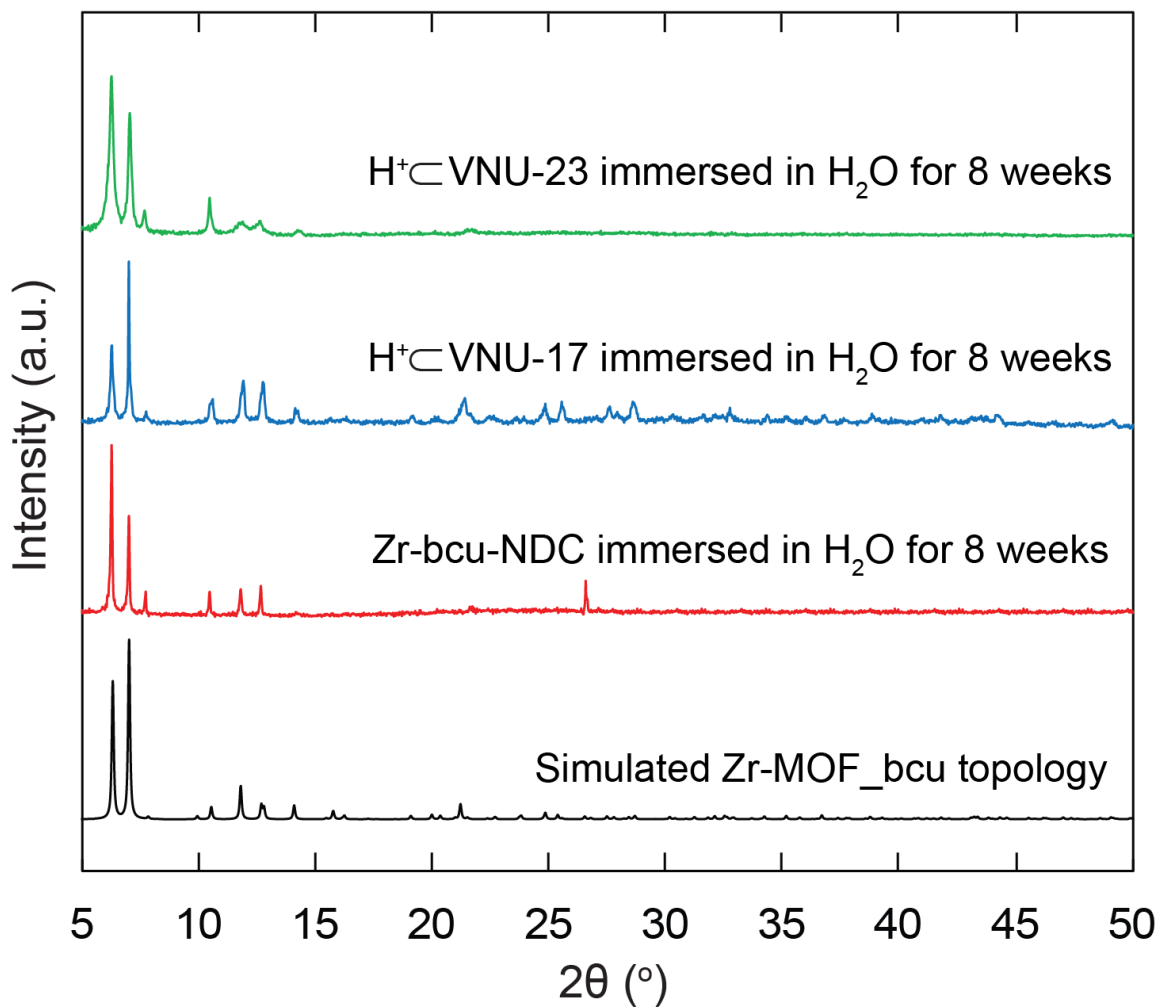

**Figure S8.** PXRD patterns of simulated structure with bcu topology (black) in comparison with the materials immersed in water for 8 weeks such as Zr-bcu-NDC (red), H<sup>+</sup>∩VNU-17 (blue), and H<sup>+</sup>∩VNU-23 (green).

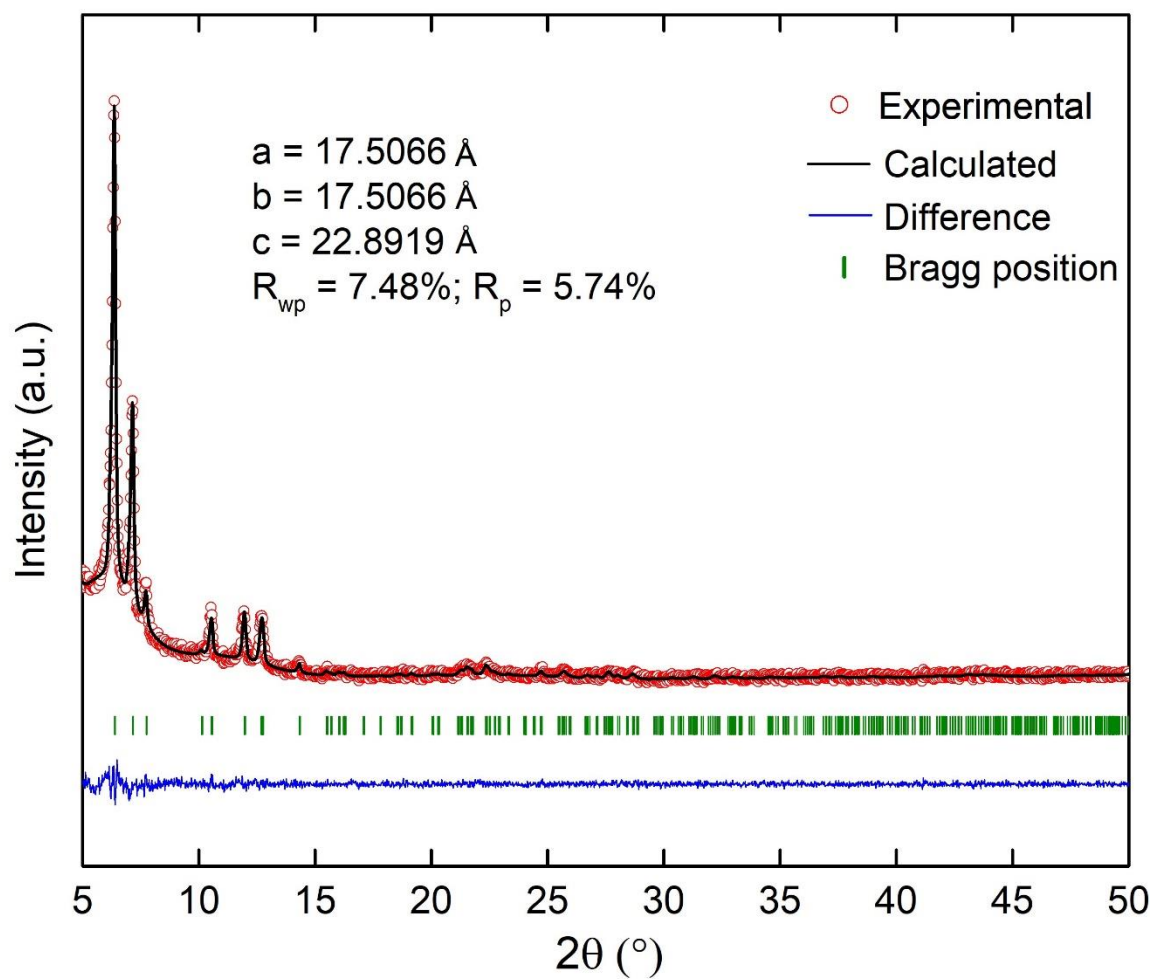

**Figure S9.** The Rietveld refinements using  $P_1$  space group of PbC-VNU-23: The experimental (red), calculated (black), and difference (blue) patterns. The Bragg positions are marked as green bars.

## Section S5. Thermogravimetric analysis (TGA) and Differential scanning calorimetry (DSC) curves

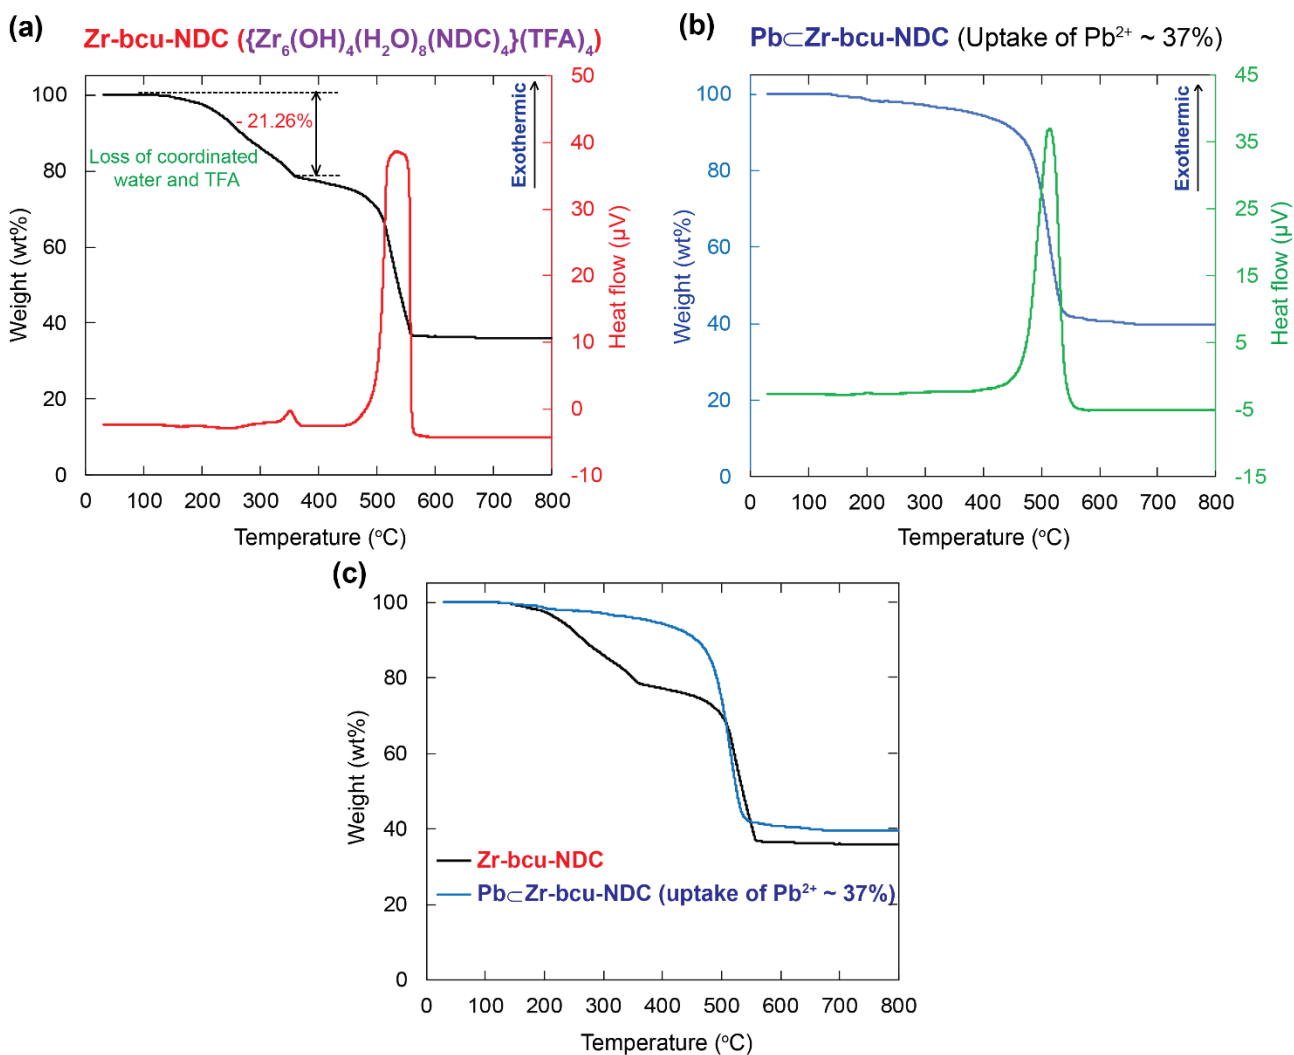

**Figure S10.** TGA-DSC curves of Zr-bcu-NDC (a), and Pb-Zr-bcu-NDC (b). TGA curves of Zr-bcu-NDC (black) in comparison with Pb-Zr-bcu-NDC (blue) (c). Herein, Pb-Zr-bcu-NDC sample was collected after adsorption of  $Pb^{2+}$  ( $20 \text{ mg L}^{-1}$ ) onto Zr-bcu-NDC in 24 h with maximum uptake of  $Pb^{2+}$  about 37%.

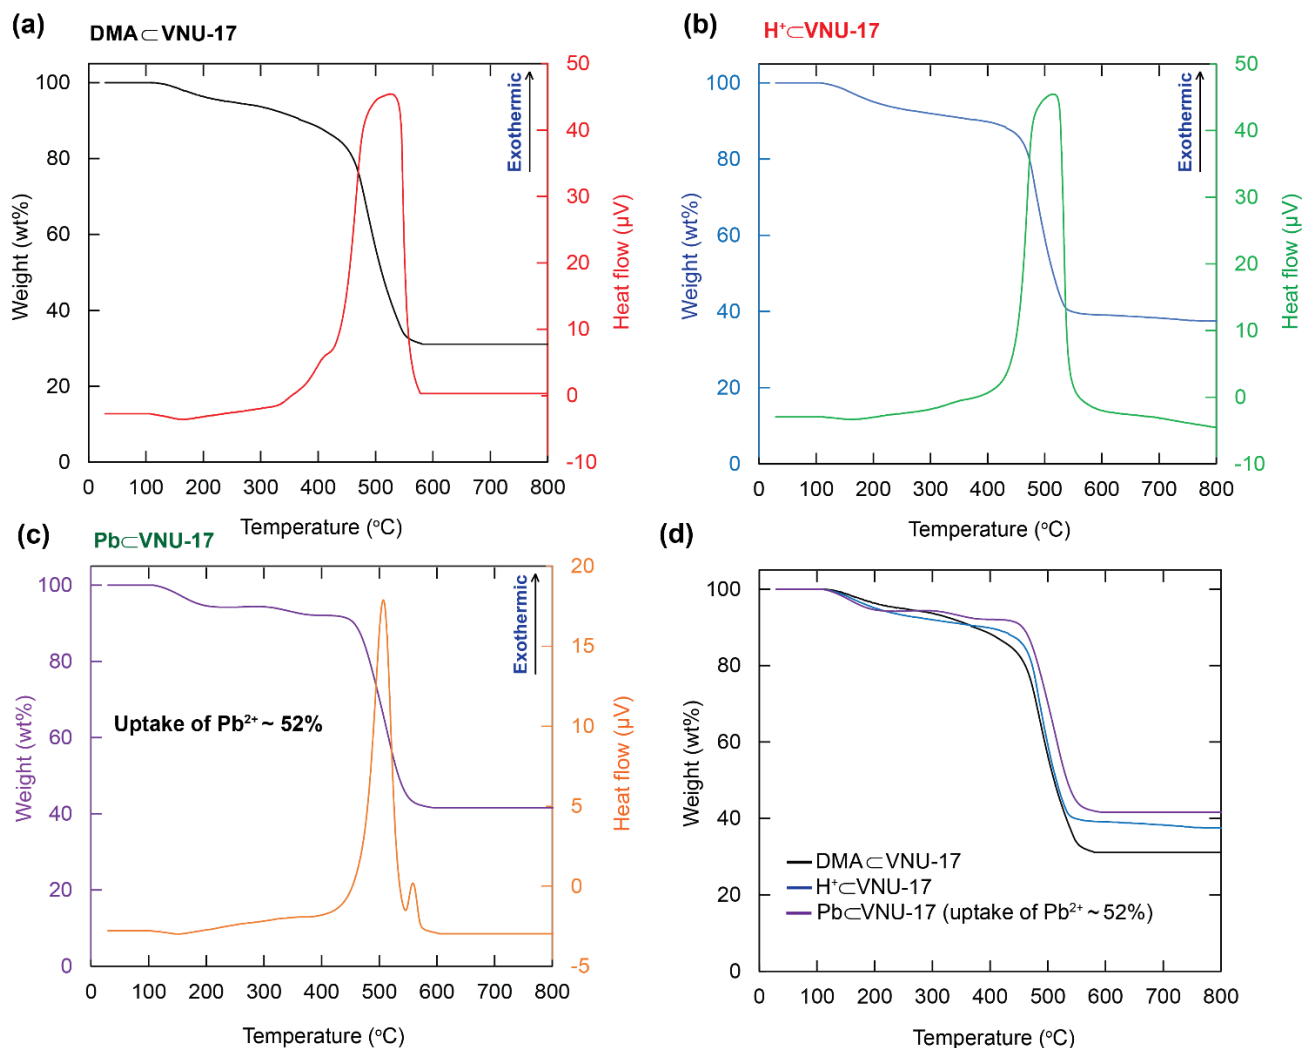

**Figure S11.** TGA-DSC curves of DMA<sub>c</sub>VNU-17 (a), H<sup>+</sup>cVNU-17 (b), and Pb<sub>c</sub>VNU-17 (c). TGA curves of DMA<sub>c</sub>VNU-17 (black) in comparison with H<sup>+</sup>cVNU-17 (blue), and Pb<sub>c</sub>VNU-17 (purple) (d). Herein, Pb<sub>c</sub>VNU-17 sample was obtained after adsorption of Pb<sup>2+</sup> (20 mg L<sup>-1</sup>) onto H<sup>+</sup>cVNU-17 in 24 h with maximum uptake of Pb<sup>2+</sup> about 52%.

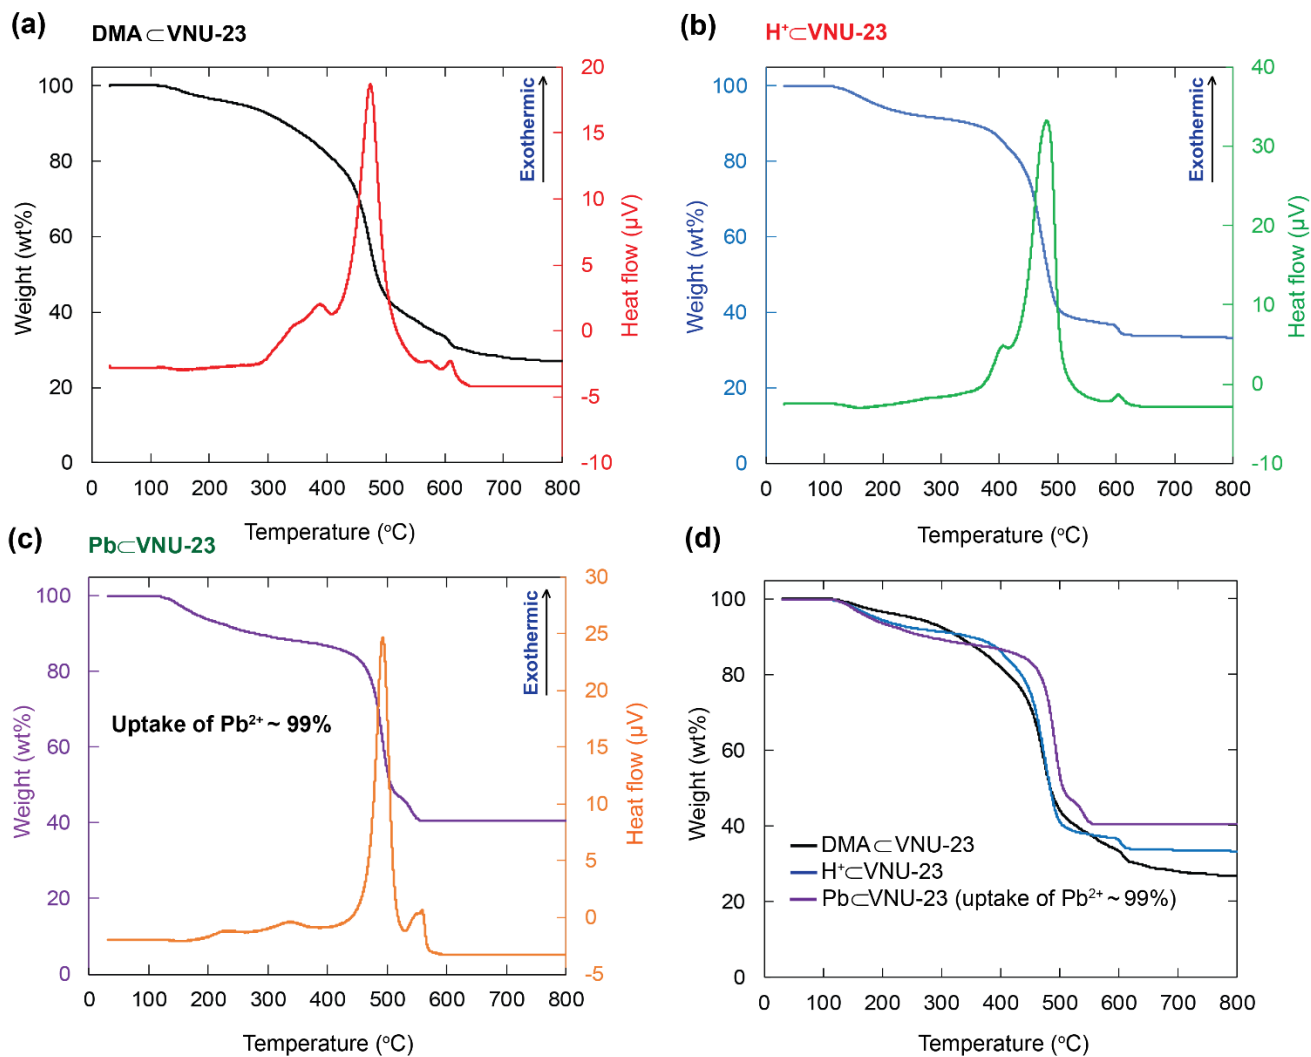

**Figure S12.** TGA-DSC curves of DMAcVNU-23 (a), H<sup>+</sup>cVNU-23 (b), and Pb<sup>+</sup>cVNU-23 (c). TGA curves of DMAcVNU-23 (black) in comparison with H<sup>+</sup>cVNU-23 (blue), and Pb<sup>+</sup>cVNU-23 (purple) (d). Herein, Pb<sup>+</sup>cVNU-23 sample was obtained after adsorption of Pb<sup>2+</sup> (20 mg L<sup>-1</sup>) onto H<sup>+</sup>cVNU-23 in 24 h with maximum uptake of Pb<sup>2+</sup> about 99%.

## Section S6. N<sub>2</sub> adsorption measurement

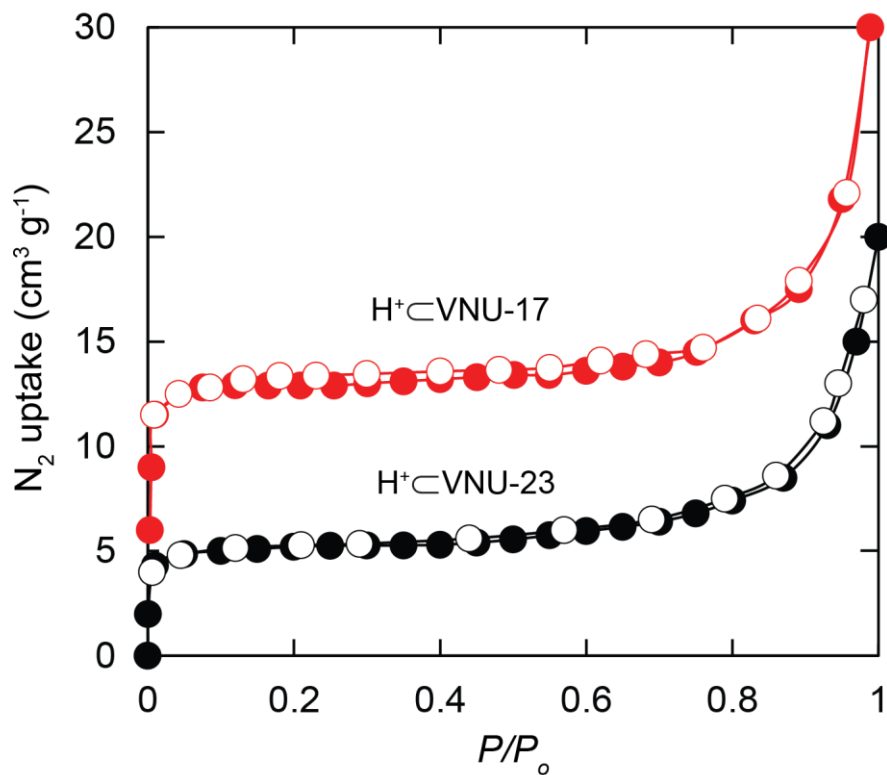

**Figure S13.** N<sub>2</sub> isotherm of H<sup>+</sup>CVNU-17 (red) and H<sup>+</sup>CVNU-23 (black) at 77K. The closed and open circles symbolize the adsorption and desorption branches of the isotherm, respectively.



**Section S7.** Scanning electron microscopy (SEM) and energy-dispersive X-ray mapping (EDX-mapping) analysis

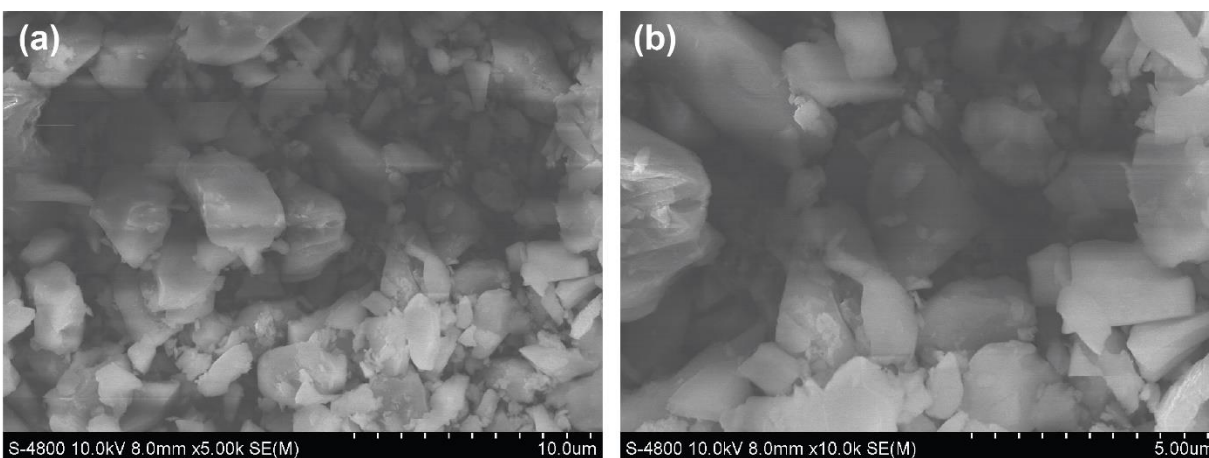

**Figure S14.** SEM images of Zr-bcu-NDC at different scale bars of 10.0 μm, and 5.00 μm, respectively.

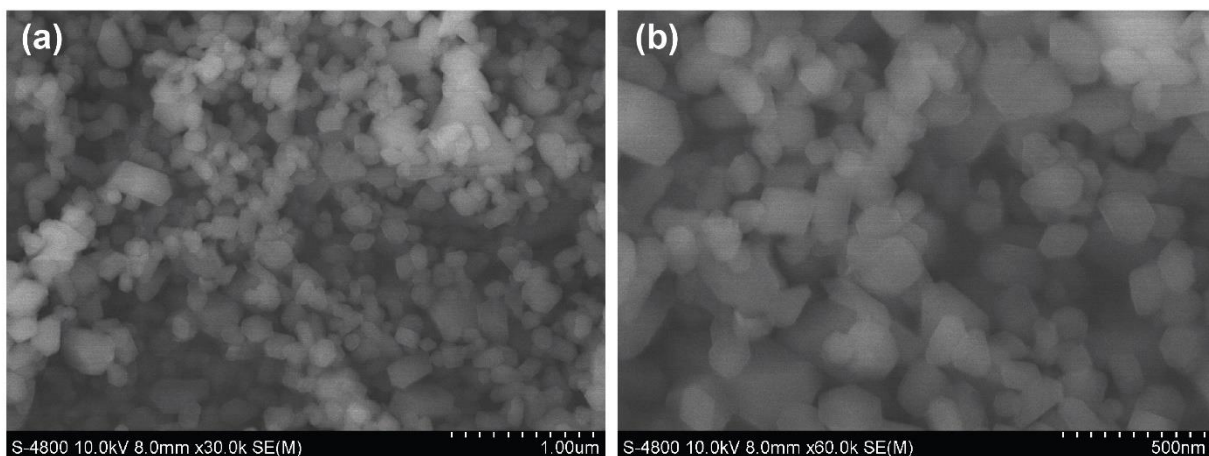

**Figure S15.** SEM images of H<sup>+</sup>@VNU-17 at different scale bars of 1.00 μm, and 500 nm, respectively.

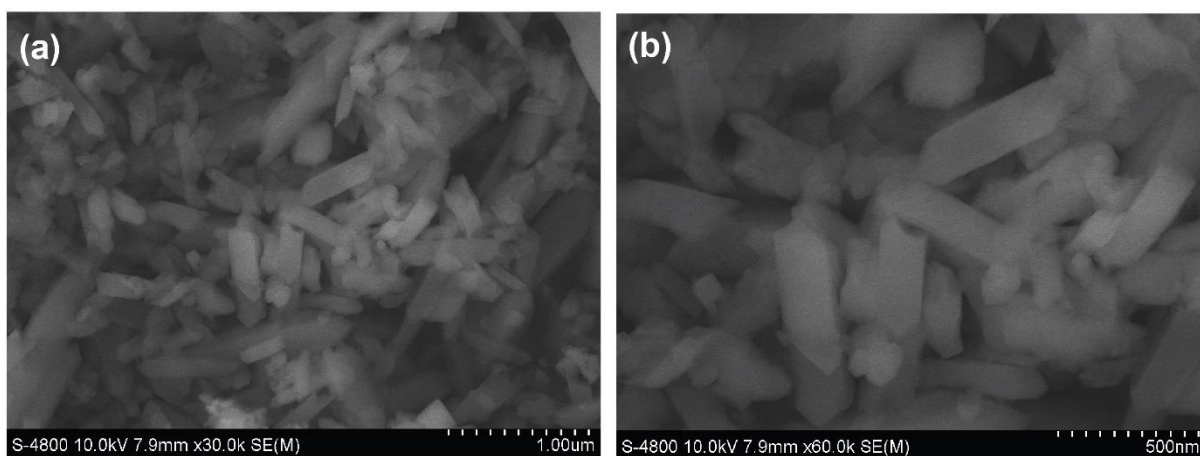

**Figure S16.** SEM images of H<sup>+</sup>@VNU-23 at different scale bars of 1.00 μm, and 500 nm, respectively.

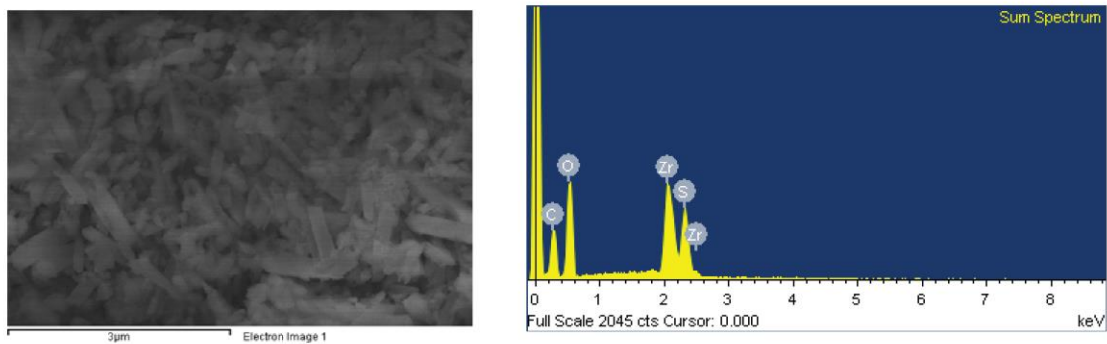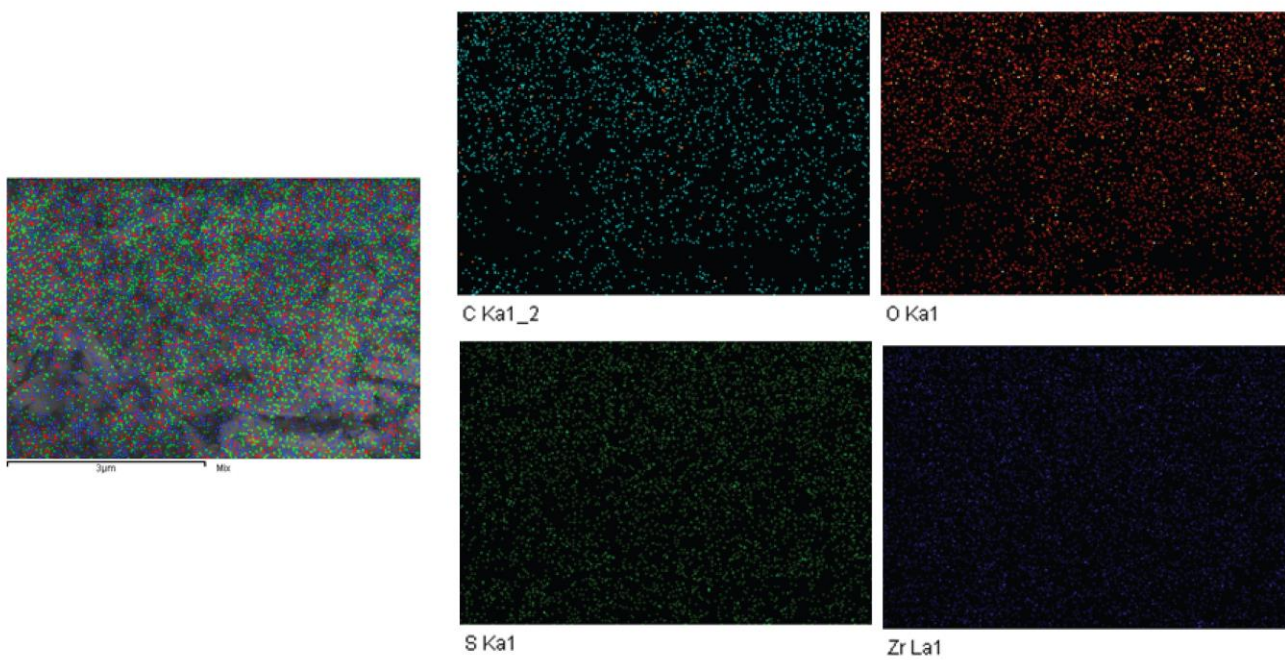

**Figure S17.** Elemental mapping by SEM-EDX of H<sup>+</sup>cVNU-23.

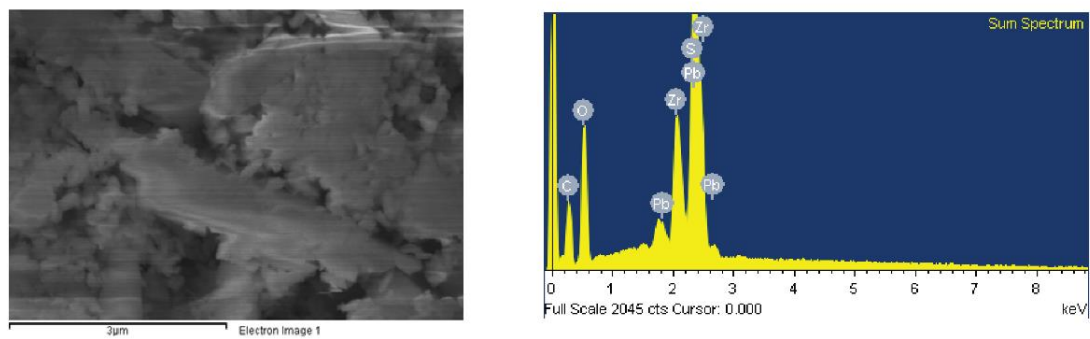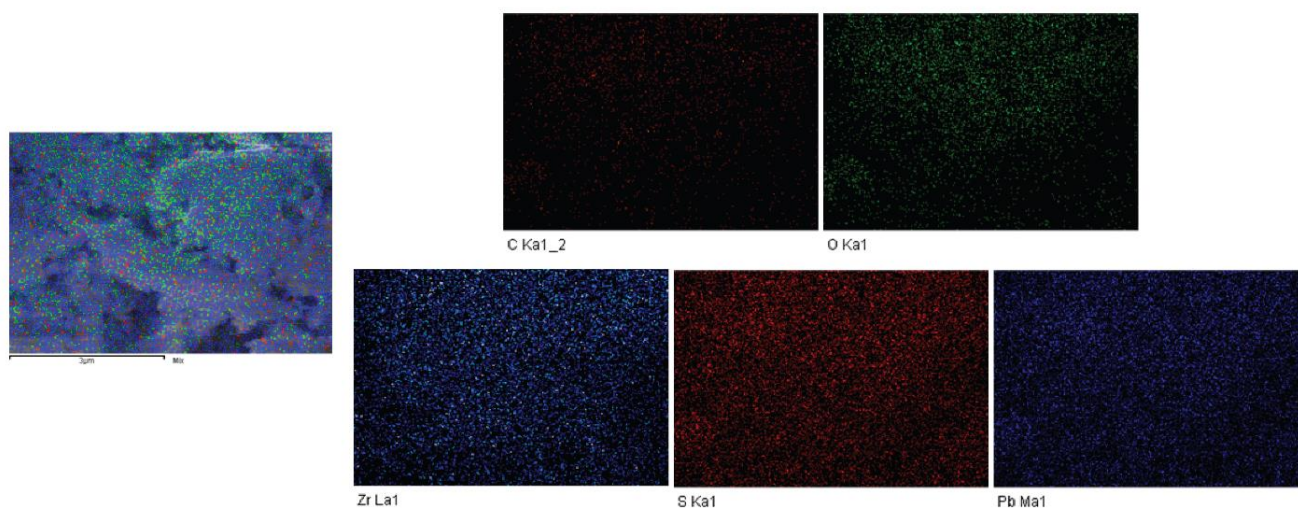

**Figure S18.** Elemental mapping by SEM-EDX of PbC-VNU-23 (uptake of Pb<sup>2+</sup> ~ 99%).



**Section S8.** Transmission electron microscopy (TEM) analysis

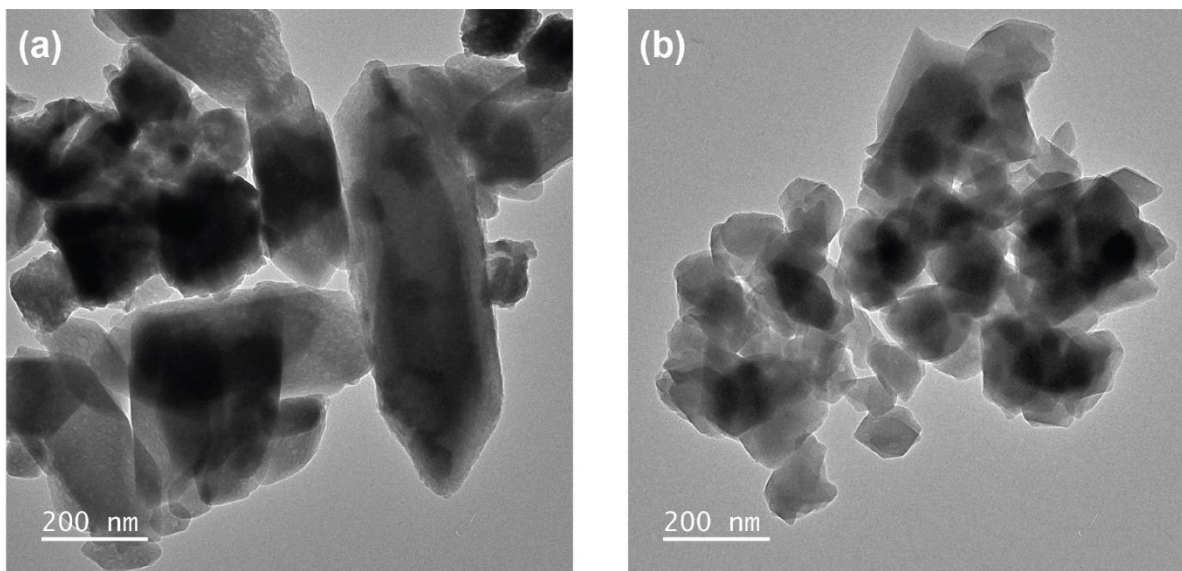

**Figure S19.** TEM images of H<sup>+</sup>VNU-23 before adsorption of Pb<sup>2+</sup> (a) and after recycling (b) at scale bar of 200 nm.

## Section S9. Adsorption studies

### Adsorption isotherms

The four adsorption isotherm models of Langmuir, Freundlich, Temkin, and Dubinin-Radushkevich are displayed in the equations (1), (2), (3), and (4):

$$q_e = \frac{q_m \cdot K_L \cdot C_e}{1 + K_L \cdot C_e} \quad (1)$$

$$q_e = K_F \cdot C_e^{1/n} \quad (2)$$

$$q_e = \frac{RT}{b} \ln(k_T C_e) \quad (3)$$

$$q_e = q_m \cdot e^{-K_{DR} \cdot \varepsilon^2} \quad (4)$$

Where  $C_e$  ( $\text{mg L}^{-1}$ ) and  $q_e$  ( $\text{mg g}^{-1}$ ) are the  $\text{Pb}^{2+}$  concentration and adsorption capacity at equilibrium, respectively,  $q_m$  ( $\text{mg g}^{-1}$ ) is the theoretical maximum capacity of the  $\text{Pb}^{2+}$  adsorption.  $K_L$  ( $\text{L mg}^{-1}$ ),  $K_F$  ( $\text{mg g}^{-1} (\text{L g}^{-1})^{1/n}$ ),  $K_T$  ( $\text{L mg}^{-1}$ ), and  $K_{DR}$  ( $\text{mg g}^{-1}$ ) symbolize the constants of Langmuir, Freundlich, Temkin, and Dubinin-Radushkevich models, respectively.  $1/n$  value illustrates the adsorption capacity index of Freundlich isotherm.  $b$ ,  $R$ ,  $T$  are the constant of adsorption heat, gas, and temperature in Kelvin, respectively.  $\varepsilon$  is a constant.

The separation factor  $R_L$  is also employed by eqn (5):

$$R_L = \frac{1}{1 + K_L C_o} \quad (5)$$

Where  $C_o$  and  $K_L$  are the initial concentration of  $\text{Pb}^{2+}$  and the constant of Langmuir, respectively.

### Adsorption kinetics

The pseudo first order, pseudo second order, and intra-particle diffusion models obey the equations (6), (7), and (8):

$$q_t = q_e \cdot (1 - e^{-k_1 t}) \quad (6)$$

$$\frac{t}{q_t} = \frac{1}{k_2 q_e^2} + \frac{t}{q_e} \quad (7)$$

$$q_t = k_i t^{1/2} + c \quad (8)$$

Where  $q_t$  ( $\text{mg g}^{-1}$ ) and  $q_e$  ( $\text{mg g}^{-1}$ ) are the  $\text{Pb}^{2+}$  uptake amounts at  $t$  and equilibrium time, respectively.  $k_1$  ( $\text{min}^{-1}$ ),  $k_2$  ( $\text{g mg}^{-1} \text{min}^{-1}$ ), and  $k_i$  ( $\text{g mg}^{-1} \text{min}^{-1}$ ) are the rate constants of pseudo first order, pseudo second order, and intra-particle diffusion models, and  $c$  is the constant indicating the thickness of the boundary layer.

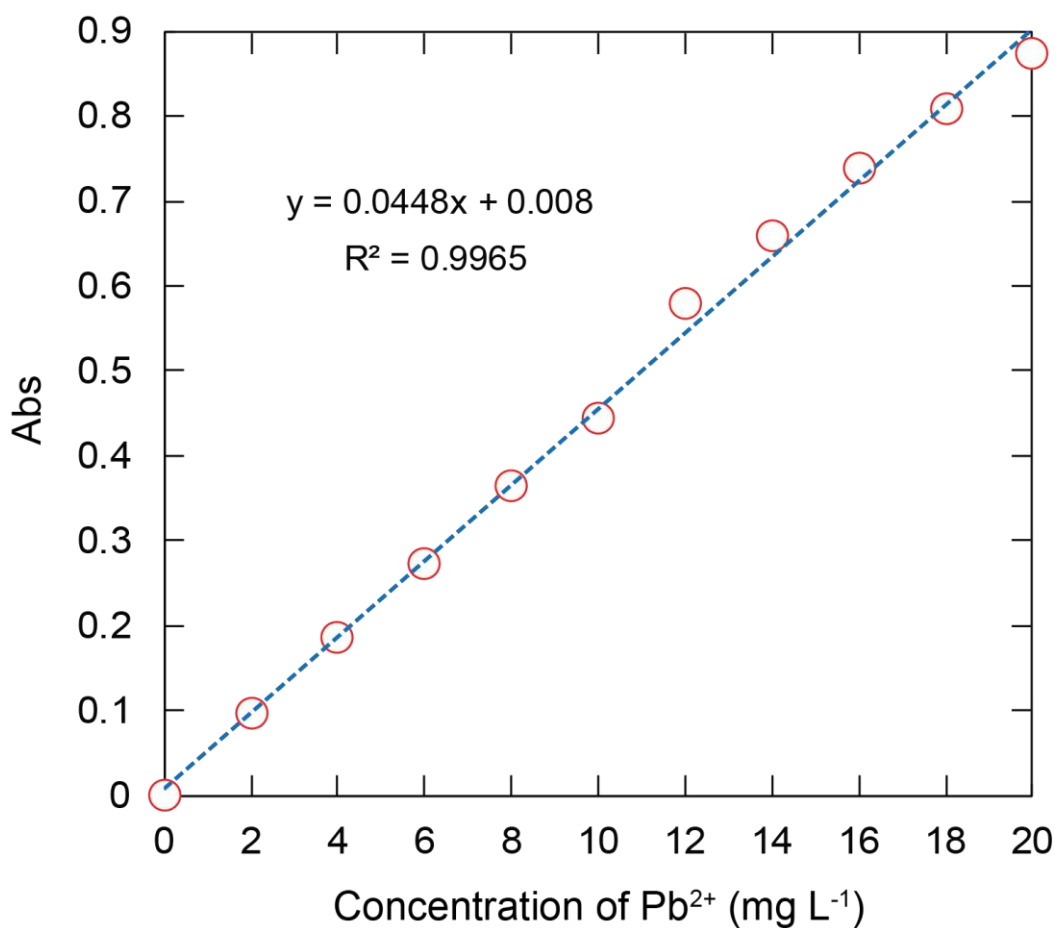

**Figure S20.** The relationship between the absorbed intensity (red dots) of  $\text{Pb}^{2+}$  and different concentrations of 0 - 20  $\text{mg L}^{-1}$  by linear fitting.

## The adsorption of $\text{Pb}^{2+}$ onto $\text{H}^+\text{C}^+\text{VNU-17}$

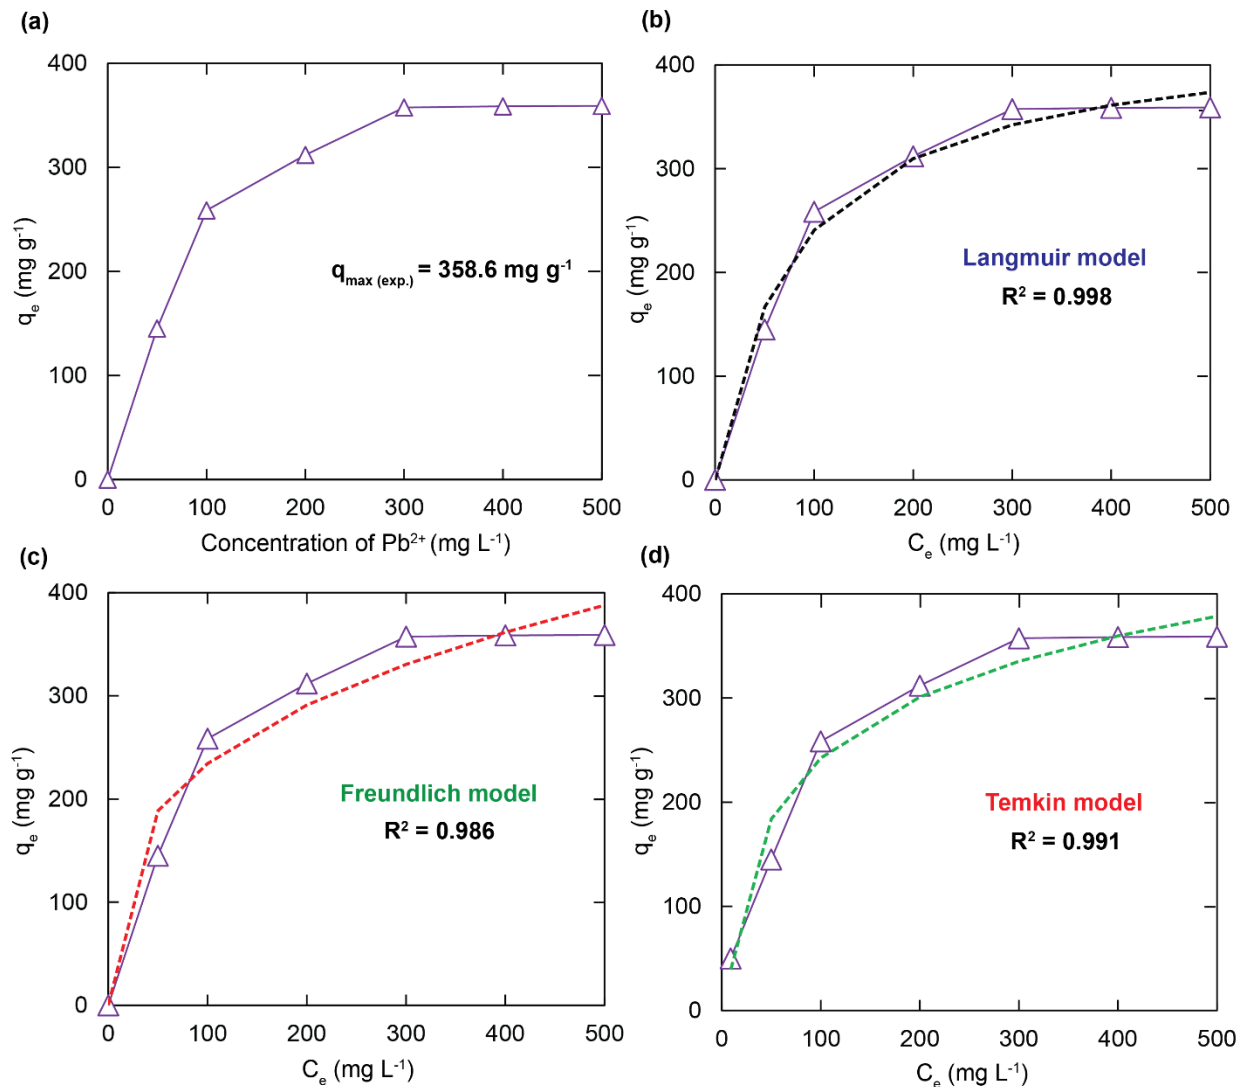

**Figure S21.** Effect of initial concentration on the adsorption capacity of  $\text{Pb}^{2+}$  onto  $\text{H}^+\text{C}^+\text{VNU-17}$  [ $m = 30 \text{ mg}$ ,  $V = 100 \text{ mL}$ ,  $C_0$ :  $50 - 500 \text{ mg L}^{-1}$ ,  $\text{pH} = 5.5$ ,  $t = 24 \text{ h}$ ] (a). Data fitting with the adsorption isotherm models: Langmuir (b), Freundlich (c), Temkin (d).



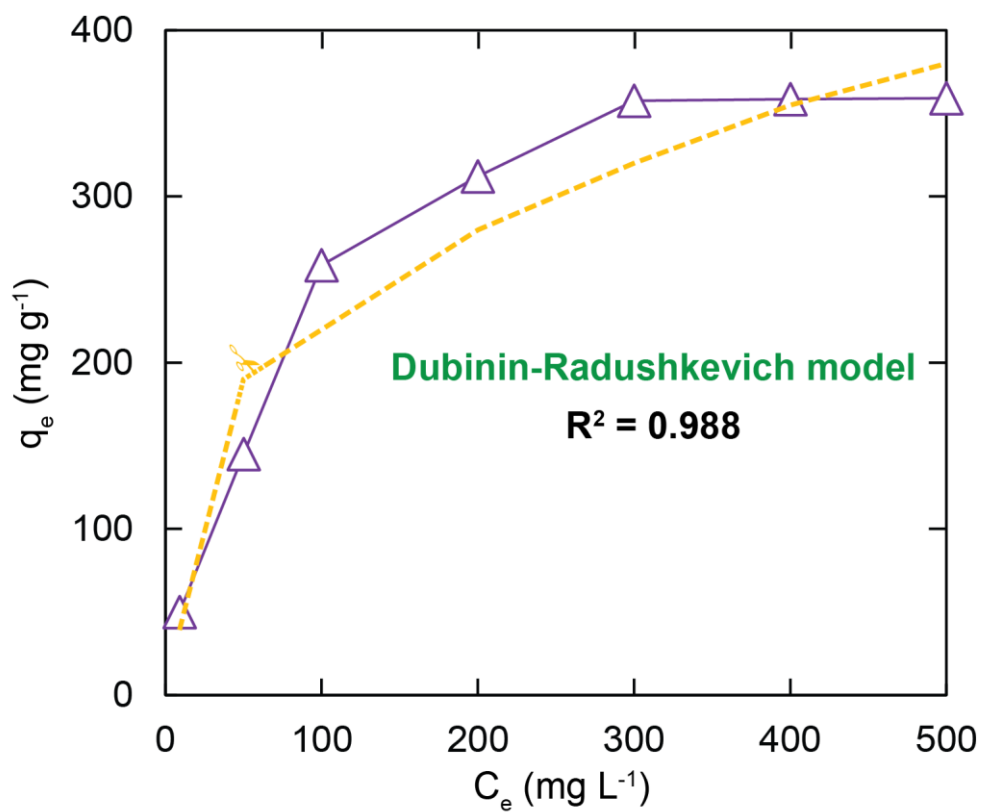

**Figure S22.** Data fitting with the Dubinin-Radushkevich adsorption isotherm model of the  $Pb^{2+}$  adsorption onto H<sup>+</sup>CVNU-17.

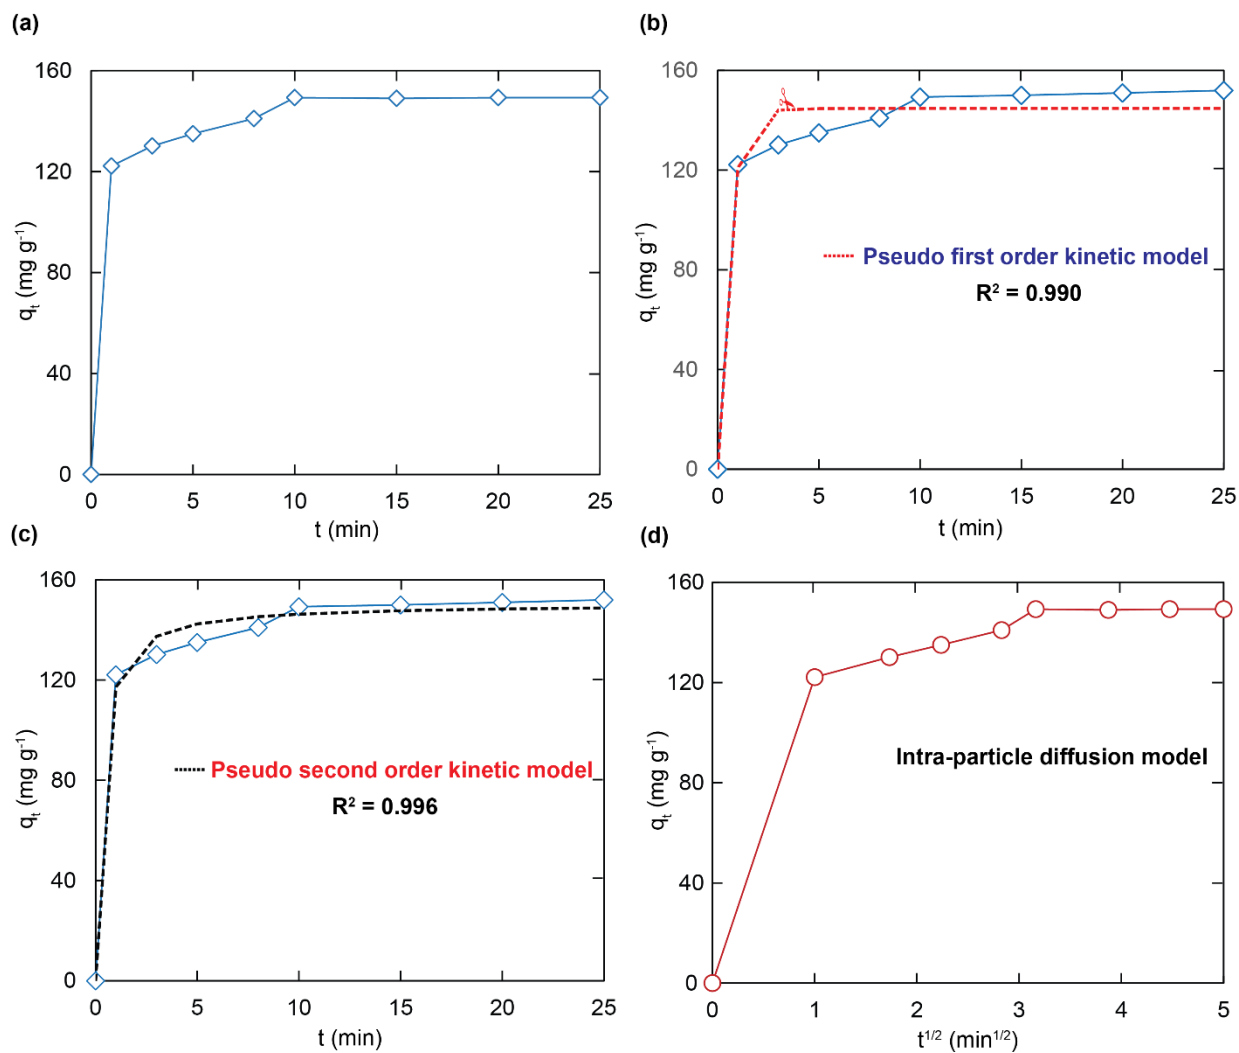

**Figure S23.** The kinetic curve for the adsorption of Pb<sup>2+</sup> on H<sup>+</sup>CVNU-17 [ $m = 5$  mg,  $V = 50$  mL,  $C_o = 40$  mg L<sup>-1</sup>, pH = 5] (a). Data fitting with the adsorption kinetic models: pseudo first order (b), pseudo second order (c), and intra-particle diffusion model (d).

## The adsorption of $\text{Pb}^{2+}$ onto $\text{H}^+\text{-VNU-23}$

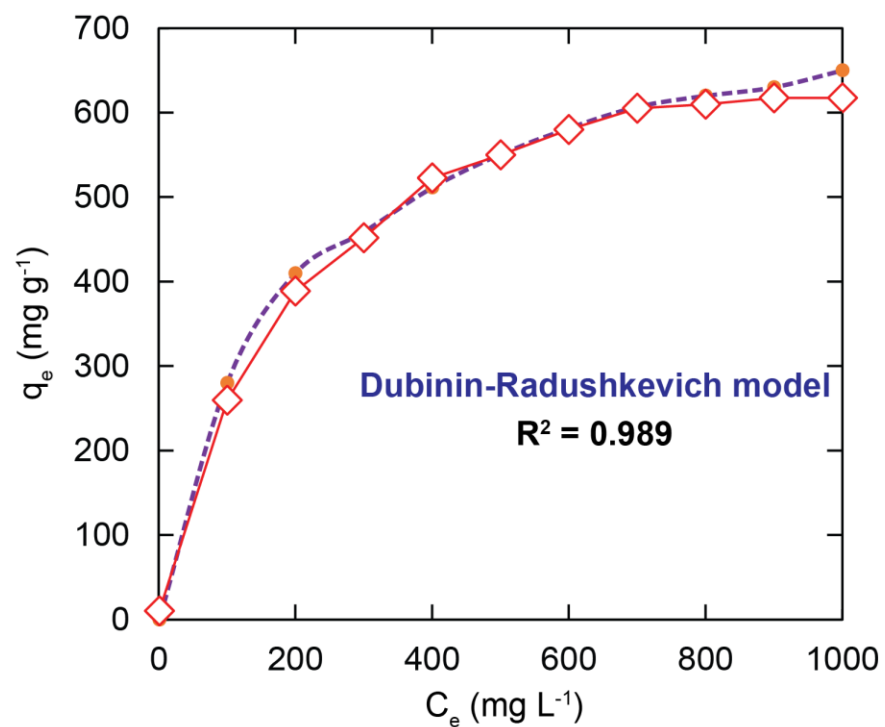

**Figure S24.** Data fitting with the Dubinin-Radushkevich adsorption isotherm model of the  $\text{Pb}^{2+}$  adsorption onto  $\text{H}^+\text{-VNU-23}$ .

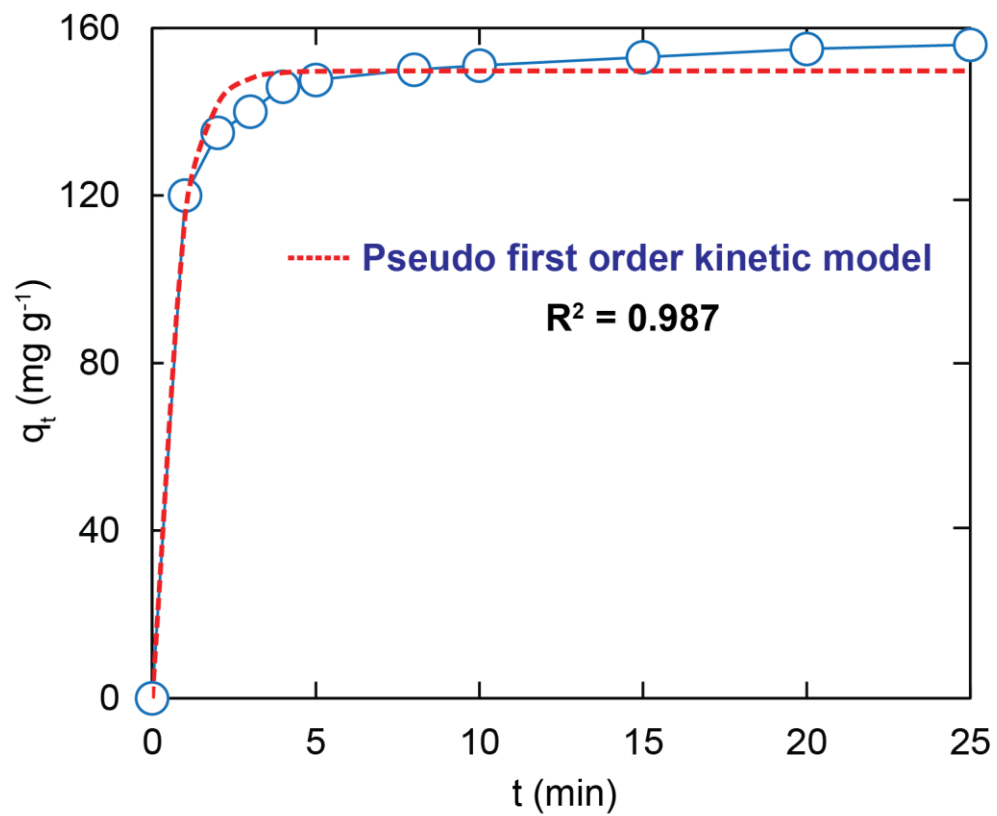

**Figure S25.** Data fitting with the pseudo first order kinetic model of the  $\text{Pb}^{2+}$  adsorption onto  $\text{H}^+\text{CVNU-23}$ .

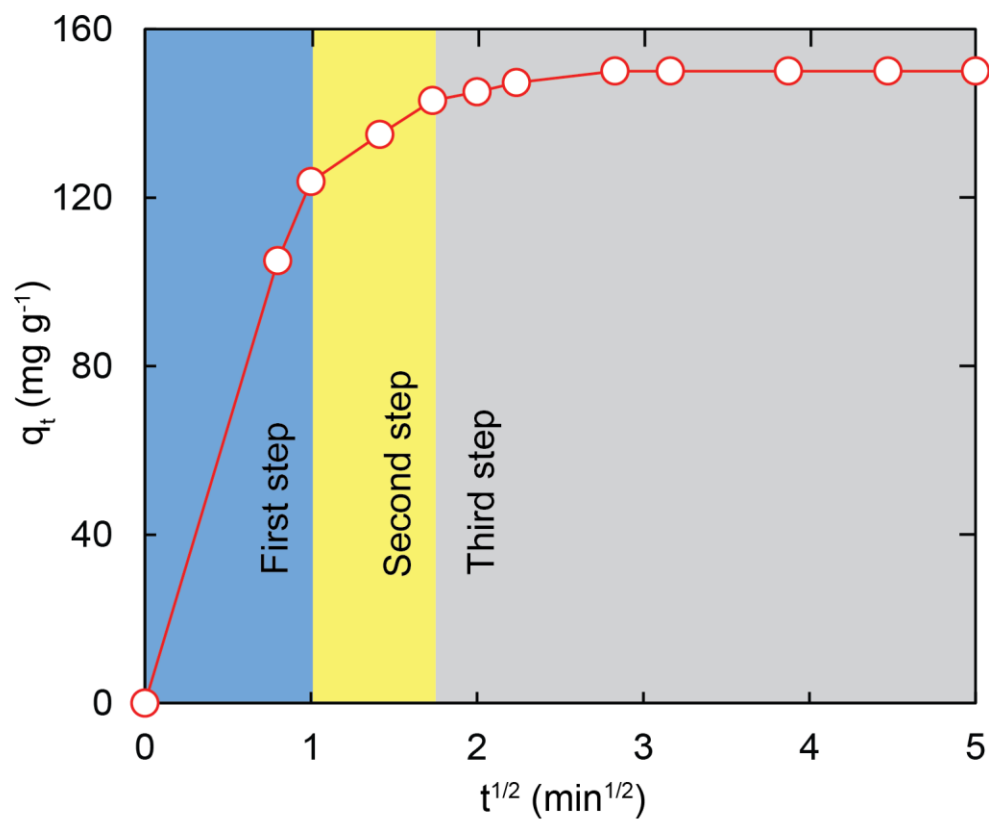

**Figure S26.** Data fitting with the intra-particle diffusion model of the Pb<sup>2+</sup> adsorption onto H<sup>+</sup>CVNU-23.

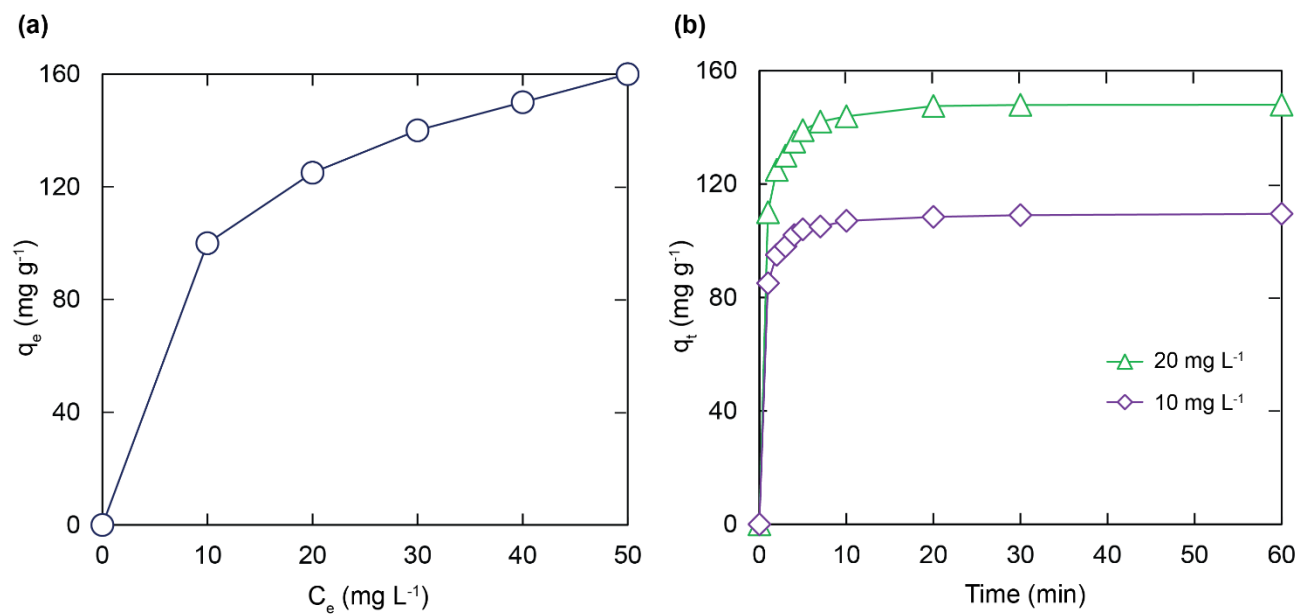

**Figure S27.** (a) Effect of low initial concentrations on the adsorption capacity of  $Pb^{2+}$  onto  $H^+CVNU-23$  [ $m = 30$  mg,  $V = 100$  mL,  $C_0$ : 10 - 50 mg L<sup>-1</sup>, pH = 5.5,  $t = 24$  h]; (b) The kinetic curve for the adsorption of  $Pb^{2+}$  at low concentrations onto  $H^+CVNU-23$  [ $m = 5$  mg,  $V = 50$  mL,  $C_0 = 10$  mg L<sup>-1</sup> and 10 mg L<sup>-1</sup>, pH = 5].

**Section S10.** The stability of VNU-23 during the adsorption and desorption process of  $\text{Pb}^{2+}$

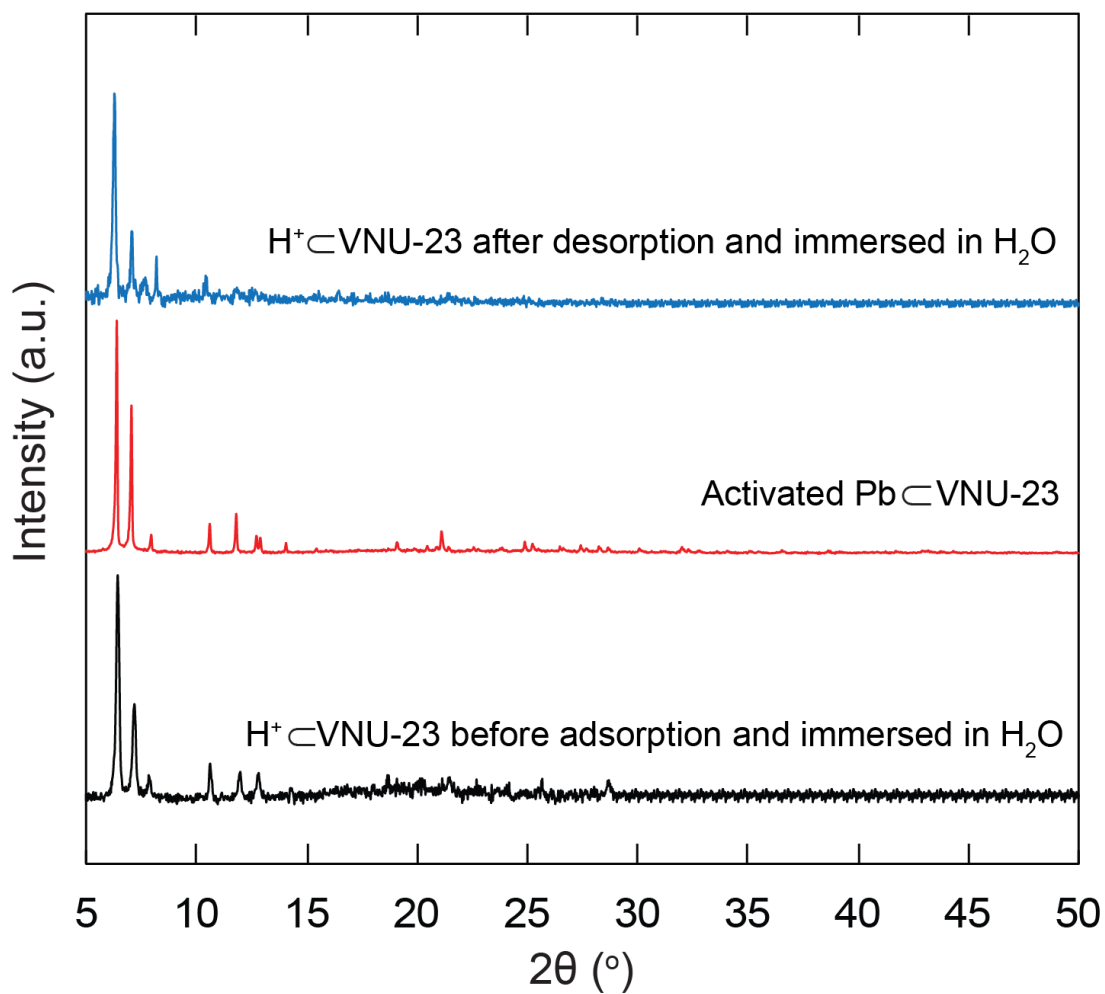

**Figure S28.** PXR D pattern of  $\text{H}^+\subset\text{VNU-23}$  before adsorption of  $\text{Pb}^{2+}$  (black), and  $\text{Pb}\subset\text{VNU-23}$  (red) as compared to the experimental pattern from the subjecting  $\text{H}^+\subset\text{VNU-23}$  after desorption of  $\text{Pb}^{2+}$ .

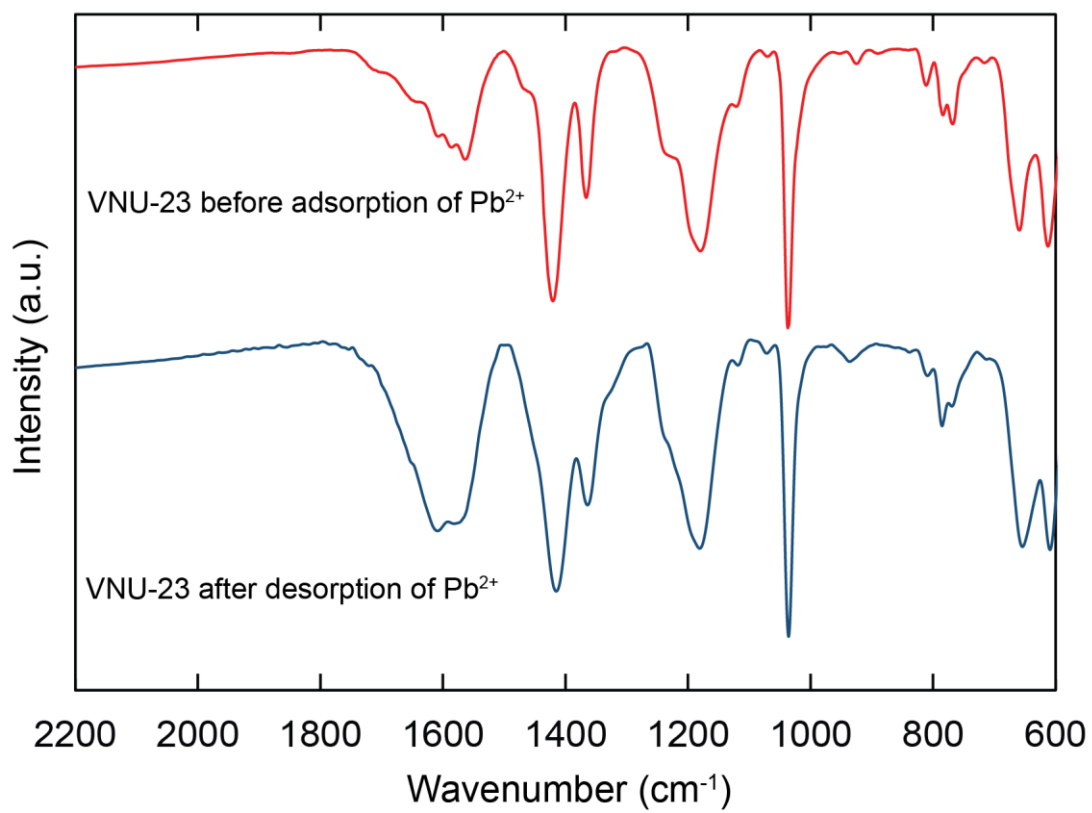

**Figure S29.** FT-IR spectrum of VNU-23 before adsorption of Pb<sup>2+</sup> (red) in comparison with FT-IR spectrum of VNU-23 after desorption of Pb<sup>2+</sup> (blue).
